# Supplementary material
Source: publisher figshare collection journal article supplement (https://frontiersin.figshare.com/ndownloader/files/10655932)
Supplement: Supplementary file [file 10655932]

## Positive, negative and IgG - controls for Immunohistochemistry (IHC)

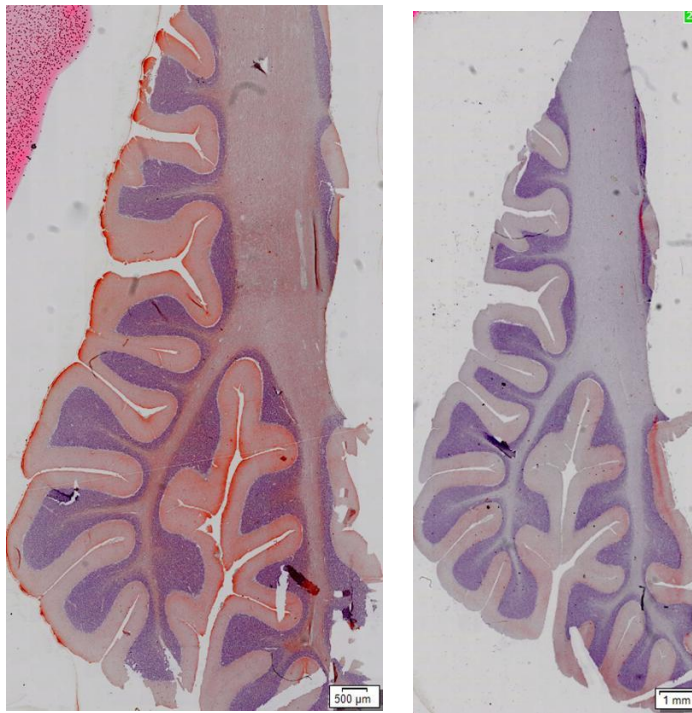

**A**

**B**

Supplementary Figure 1. Histological images of the positive controls (human cerebellum, **A**: CD90 and **B**: CD117)

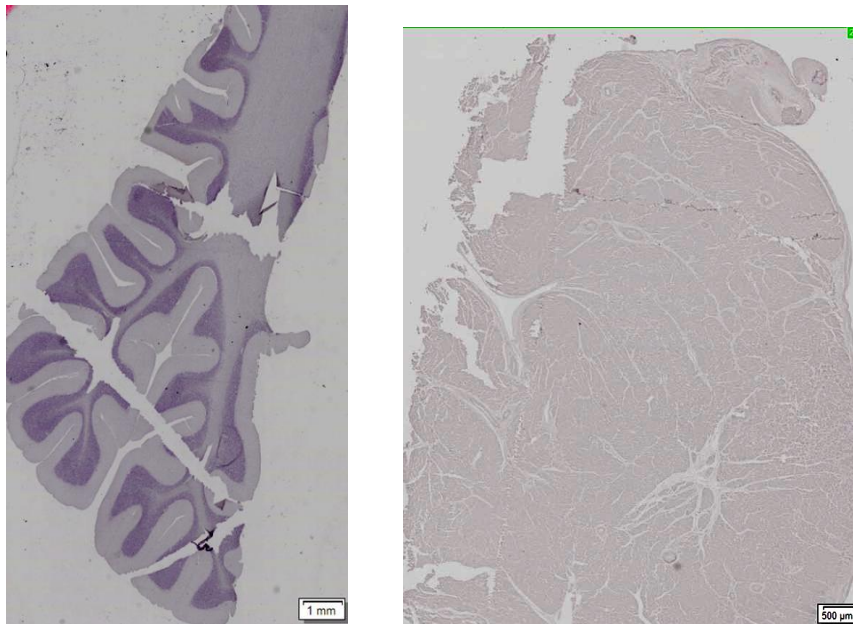

**C**

**D**

Supplementary Figure 2. Histological images of the IgG – control (**C**: human cerebellum, **D**: human myocardium)

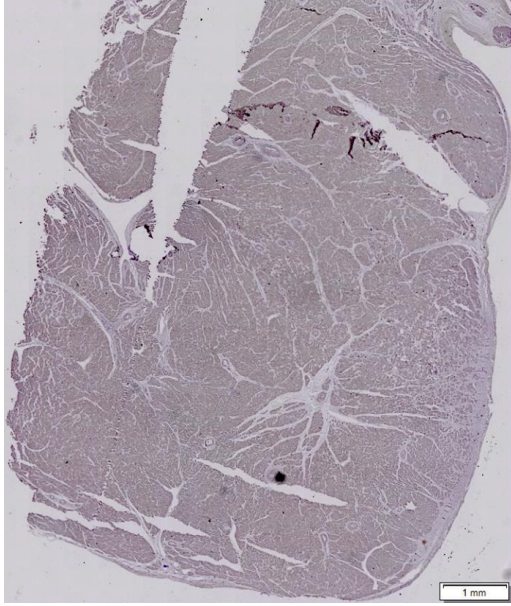

**E**  
Supplementary Figure 3. Histological image of the negative control (**E**: human myocardium)
